# Supplementary material
Source: Springer Nature journal article supplement (https://www.springermedizin.de/resource/supplementary/12885_2014_5145_MOESM1_ESM.pdf/9468500)
Supplement: MOESM1 [file 9468500]

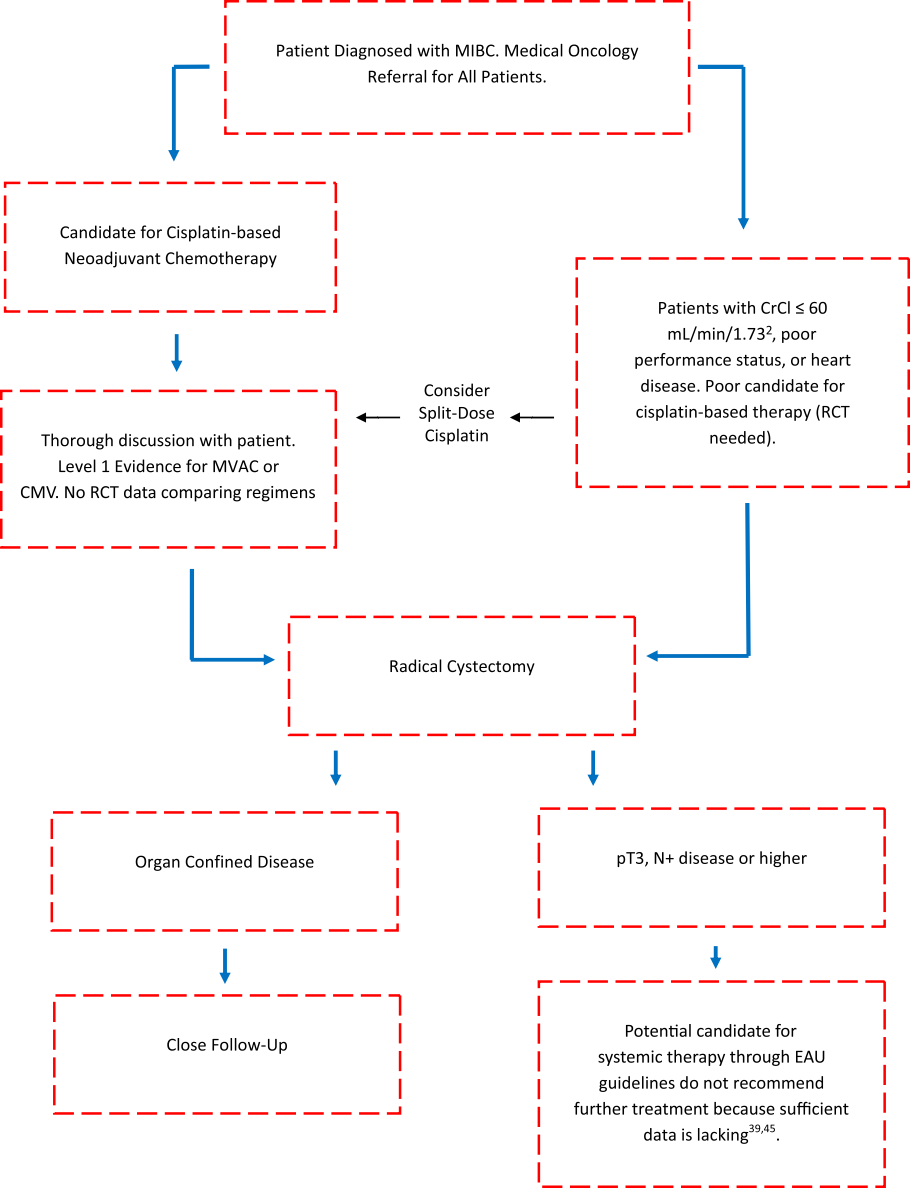

Patient Diagnosed with MIBC. Medical Oncology Referral for All Patients.

Candidate for Cisplatin-based Neoadjuvant Chemotherapy

Patients with CrCl  $\leq 60$  mL/min/1.73<sup>2</sup>, poor performance status, or heart disease. Poor candidate for cisplatin-based therapy (RCT needed).

Consider Split-Dose Cisplatin

Thorough discussion with patient. Level 1 Evidence for MVAC or CMV. No RCT data comparing regimens

Radical Cystectomy

Organ Confined Disease

pT3, N+ disease or higher

Close Follow-Up

Potential candidate for systemic therapy through EAU guidelines do not recommend further treatment because sufficient data is lacking<sup>39,45</sup>.
